# Supplementary material for: Effects of autologous concentrated growth factor on gingival thickness in periodontal accelerated osteogenic orthodontics: a 6-month randomized controlled trial
Source: PubMed Central journal article supplement (PMC8609726; doi:10.1186/s12903-021-01967-5), 2021-11-23
Supplement: 12903_2021_1967_MOESM1_ESM.pdf [file 12903_2021_1967_MOESM1_ESM.pdf]

**Title: Effects of Concentrated Growth Factor on Gingival Thickness in Periodontal Accelerated Osteogenic Orthodontics: A 6-month Randomized Controlled Trial**

**Authors:** Lei Qi\*, Weiwen Ge\*, Ningning Cao, Shoupeng Wang, Yifeng Qian, Xudong Wang, Lei Zhang

**Supplementary Figure 1 CGF membrane preparation.**

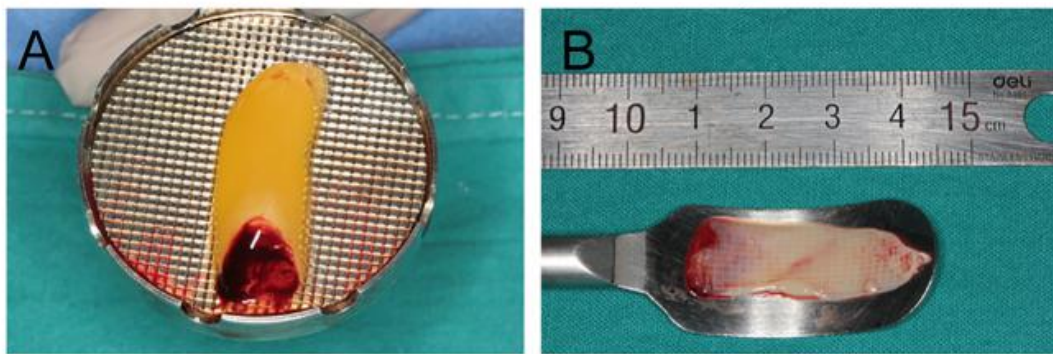

A: The CGF fibrin block was squeezed with a special box. B: CGF membrane and its length.

**Supplementary Figure 2 The process of PAOO in control group.**

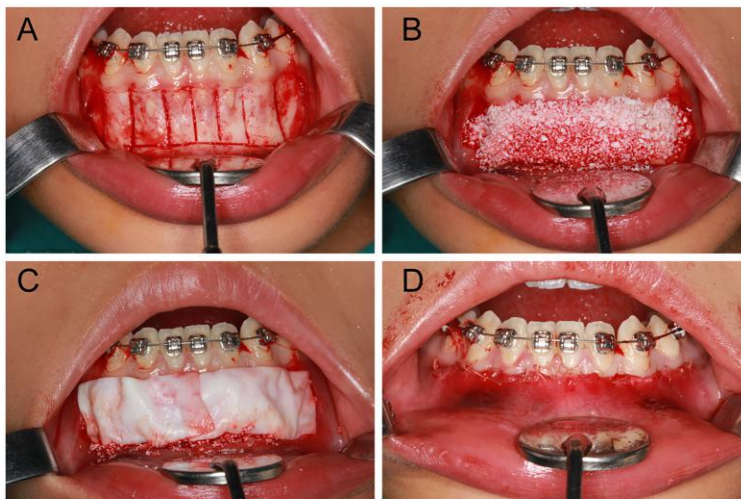

A: Flap design. B: Decortication and bone graft. C: Covering Bio-gide membrane. D: Close the incision.

### Supplementary Figure 3

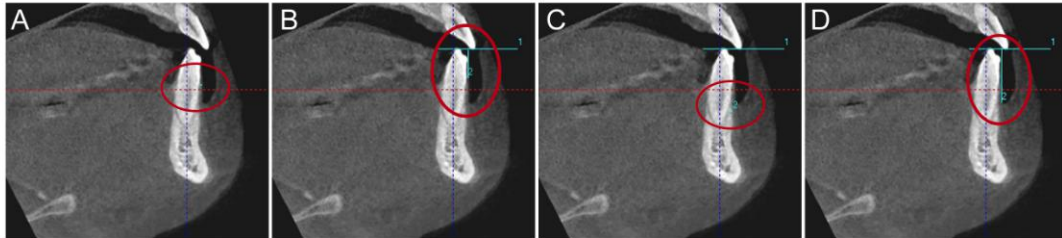

Illustration showing how the gingival thickness (GT), gingival margin height (GH), buccal alveolar bone thickness (BT), and buccal alveolar bone height (BH) were measured on CBCT images. Red circle: the region of measurement.

### Supplementary Figure 4 The images of follow-up.

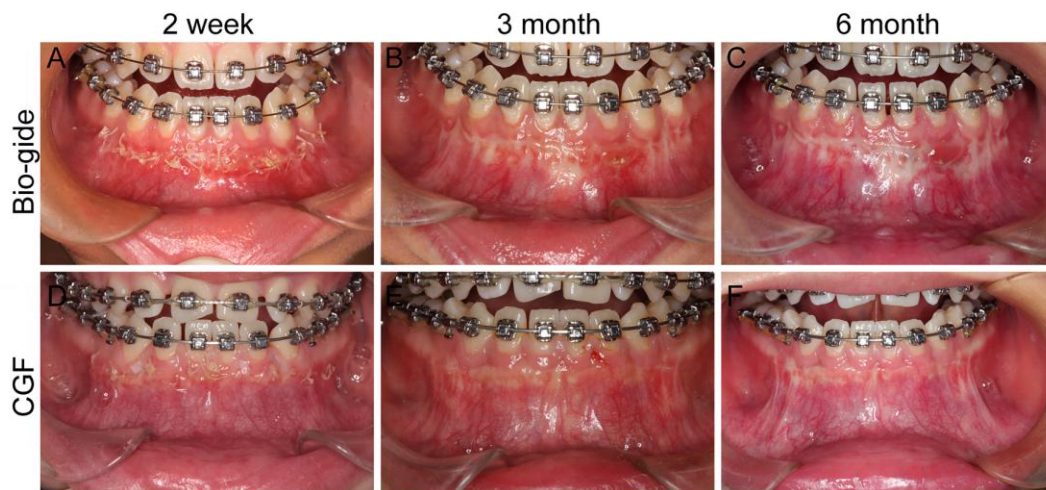

A, D: 2 weeks post-operative images; B, E: 3 months post-operative images; C, F: 6 months post-operative images.

### Supplementary Figure 5

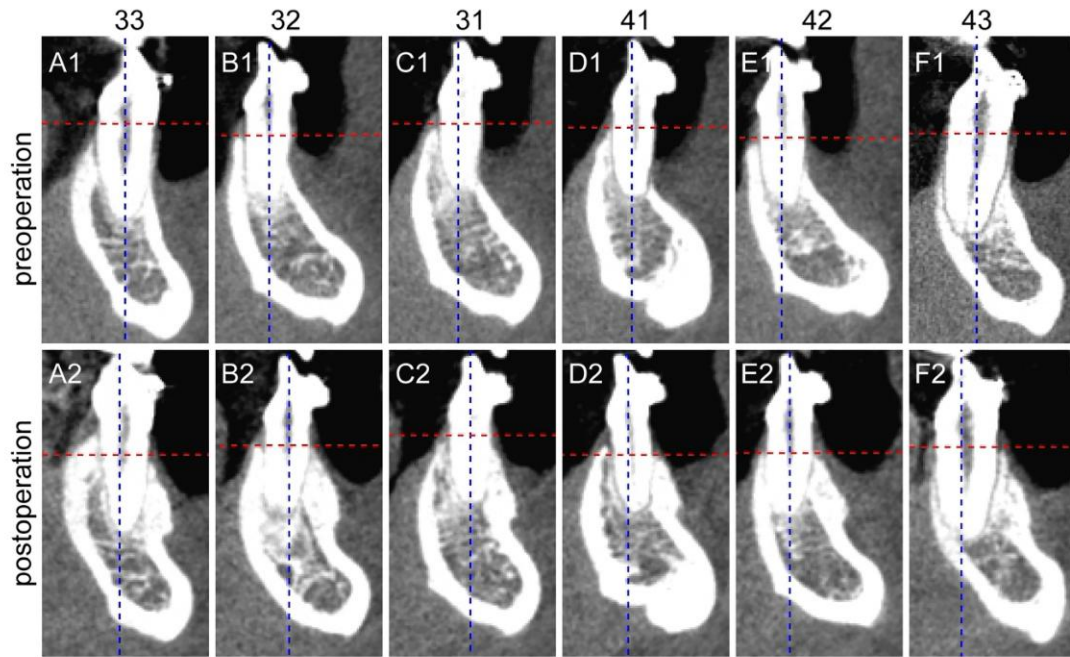

The measurements of CBCT images of central incisors, lateral incisors and canine teeth at  $t_0$  ( before durgery) and  $t_1$ ( 6 months after surgery) in the control group. 43, 33: canine teeth; 42,32: lateral incisors; 41,31: central incisors.

**Supplementary Table 1 Postoperative pain, swelling and healing evaluations**

|                       | Control group         | Test group            | <i>p</i> <sup>a</sup> |
|-----------------------|-----------------------|-----------------------|-----------------------|
| <b>Pain</b>           |                       |                       |                       |
| 2 weeks               | 2.15±0.67 (1.00-3.00) | 1.80±0.52 (1.00-3.00) | 0.024*                |
| 3 months              | 0.00±0.00 (0.00-0.00) | 0.00±0.00 (0.00-0.00) | 1.000                 |
| 6 months              | 0.00±0.00 (0.00-0.00) | 0.00±0.00 (0.00-0.00) | 1.000                 |
| <i>p</i> <sup>b</sup> | 0.000**               | 0.000**               |                       |
| <b>Swelling</b>       |                       |                       |                       |
| 2 weeks               | 1.60±0.68 (1.00-3.00) | 1.55±0.69 (1.00-3.00) | 0.786                 |
| 3 months              | 0.00±0.00 (0.00-0.00) | 0.00±0.00 (0.00-0.00) | 1.000                 |
| 6 months              | 0.00±0.00 (0.00-0.00) | 0.00±0.00 (0.00-0.00) | 1.000                 |
| <i>p</i> <sup>b</sup> | 0.000**               | 0.000**               |                       |
| <b>HI</b>             |                       |                       |                       |
| 2 weeks               | 3.00±0.73 (2.00-4.00) | 2.95±0.69 (2.00-4.00) | 0.824                 |
| 3 months              | 4.55±0.51 (4.00-5.00) | 4.65±0.49 (4.00-5.00) | 0.524                 |
| 6 months              | 5.00±0.00 (5.00-5.00) | 5.00±0.00 (5.00-5.00) | 1.000                 |
| <i>p</i> <sup>b</sup> | 0.000**               | 0.000**               |                       |

Data are expressed as the mean±standard deviation (minimum-maximum)

HI, healing index;

a Mann Whitney U Test, statistically different between groups (\*\**p*<0.01, \**p*<0.05).

b Friedman Test, significantly different compared with baseline (\*\**p*<0.01, \**p*<0.05).
